# Supplementary material
Source: PubMed Central journal article supplement (PMC3230472)
Supplement: cbt1205_0407SD1.pdf [file cbt1205_0407SD1.pdf]

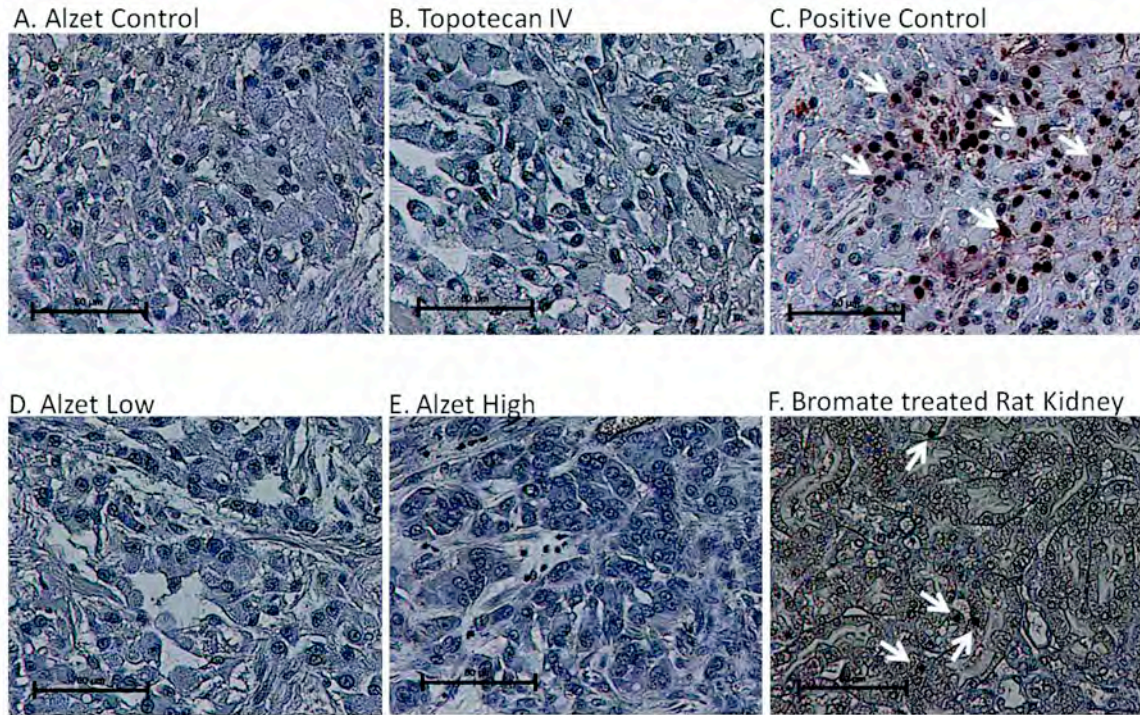

**Supplemental Figure S1. Effect of dosing regimens of topotecan on apoptosis in mouse PC-3 tumor xenografts.** Six to seven week old NCr nude mice (4-5 per group) were implanted subcutaneously with PC-3 cells. When tumors reached 400 mm<sup>3</sup> mice were treated using implantable continuous infusion (Alzet) pumps or tail vein injections. Micrographs of representative tumor sections after TUNEL staining for apoptosis (scale bars = 60 µm) were examined three days after the last treatment. Alzet control (**A**), topotecan IV (**B**), Alzet low (**D**) and Alzet high (**E**) doses had no evidence of TUNEL staining. The positive controls, prostate tumors incubated with DNAase for 60 min (**C**) and rat kidney after treatment with bromated 400 mg/kg for 28 days (**F**) had evidence of TUNEL staining (arrow heads).
